# Supplementary material for: Pharmacodynamic and Toxicity Studies of 6-Isopropyldithio-2′-guanosine Analogs in Acute T-Lymphoblastic Leukemia
Source: MDPI journal article supplement (doi:10.3390/cancers16091614), 2024-04-23

## Supplementary Materials:

**Table S1:** Routine blood test results of acute toxicity test in mice.

|           | WBC        | RBC          | Hb          | MCV          | PLT            | LYMPH       | MXD        |
|-----------|------------|--------------|-------------|--------------|----------------|-------------|------------|
| Blank     | 7.44±2.88  | 9.39±0.37    | 170±1.41    | 52.55±1.06   | 565.5±0.71     | 6.29±2.13   | 0.3±0.17   |
| 307 mg/kg | 6.1±2.73   | 7.81±0.13**  | 148.5±4.95  | 57.9±0.71    | 580±76.37      | 3.05±0.91   | 0.34±0.24  |
| 350 mg/kg | 4.61±2.23  | 7.64±0.06**  | 151±5.66    | 58.7±2.26    | 579±100.41     | 3.01±1.11   | 0.22±0.13  |
| 380 mg/kg | 3.62±0.54  | 7.33±0.02*** | 134.5±3.54* | 56.85±2.62   | 514±125.87     | 2±0.4       | 0.17±0.1   |
| 414 mg/kg | 6.21±3.03  | 8.54±0.04*   | 159±12.73   | 58.95±4.31   | 512.5±130.81** | 2.76±1.37   | 0.4±0.18   |
|           | DLC        | LY%          | MID%        | DLC%         | P-LCR          | B-PLT       | HCT        |
| Blank     | 0.85±0.58  | 85.4±4.38    | 3.9±0.71    | 10.7±3.68    | 23.8±4.81      | 134.5±27.58 | 49.3±0.99  |
| 307 mg/kg | 2.72±1.58  | 51.75±8.13*  | 5.25±1.63   | 43±6.51**    | 14.75±4.31     | 84±14.14    | 45.2±1.27  |
| 350 mg/kg | 1.39±1     | 67.25±8.56   | 4.6±0.57    | 28.15±7.99   | 26.2±8.91      | 156±77.78   | 44.85±1.34 |
| 380 mg/kg | 1.45±0.04  | 55±2.83*     | 4.65±2.05   | 40.35±4.88*  | 14.8±5.66      | 72.5±10.61  | 41.65±1.77 |
| 414 mg/kg | 3.05±1.48  | 44.45±0.35*  | 6.4±0.28    | 49.15±0.07** | 26.85±7.71     | 132.5±4.95  | 50.3±3.54  |
|           | MCHC       | RDW          | RDW-SD      | MCH          | MPV            | PCT         | PDW        |
| Blank     | 345±9.9    | 11.85±0.49   | 61.6±1.56   | 18.15±0.92   | 9.3±0.14       | 0.53±0.01   | 19.3±0.14  |
| 307 mg/kg | 328.5±2.12 | 13.65±2.33   | 70.4±1.41   | 19±0.28      | 9.85±0.07      | 0.57±0.07   | 20±0.42    |
| 350 mg/kg | 336.5±2.12 | 12.95±1.91   | 70.85±6.72  | 19.75±0.92   | 9.85±0.21      | 0.57±0.11   | 20.1±0.85  |
| 380 mg/kg | 323±5.66   | 12.55±0.07*  | 65.8±6.79   | 18.35±0.49   | 9.55±0.07      | 0.49±0.12   | 20.6±0.71  |
| 414 mg/kg | 316±2.83   | 11.65±0.07*  | 72.95±15.63 | 18.6±1.56    | 10±0.57        | 0.51±0.1**  | 18.5±1.7** |

The mice in the 414 mg/kg group showed a decrease in erythrocyte content, a decrease in the percentage of lymphocytes and an increase in the percentage of granulocytes. \*p < 0.05, \*\*p < 0.01, \*\*\* p < 0.001, \*\*\*\* p < 0.0001.

**Table S2:** The results of biochemical indicators of acute toxicity test in mice.

|           | ALT       | AST       | TBIL      | ALB       | CREA      | BUN       | TG        |
|-----------|-----------|-----------|-----------|-----------|-----------|-----------|-----------|
| Blank     | 4.9±2.69  | 6.65±3.46 | 2.35±1.34 | 2.6±1.56  | 2.95±1.06 | 0.56±0.34 | 0.07±0.05 |
| 307 mg/kg | 6.35±2.62 | 5.65±1.34 | 3.2±1.13  | 3.15±0.21 | 3.5±1.41  | 0.57±0.22 | 0.07±0.02 |

| 350 mg/kg | 4.75±0.78 | 7.3±3.82  | 3.65±0.21 | 3.45±0.07 | 5.25±1.48  | 0.67±0.05  | 0.08±0.02 |
|-----------|-----------|-----------|-----------|-----------|------------|------------|-----------|
| 380 mg/kg | 4.85±1.48 | 5.9±0.42  | 3.25±0.21 | 3.5±0.57  | 2.8±0.85   | 0.61±0.06  | 0.16±0.04 |
| 414 mg/kg | 4.65±1.91 | 9.05±0.07 | 3.55±0.21 | 3.35±0.35 | 3.7±2.4    | 0.58±0.16  | 0.09±0.01 |
|           | TC        | ALP       | GLU       | K         | CL         | CK         |           |
| Blank     | 0.07±0.04 | 11±7.07   | 0.45±0.18 | 2.27±0.09 | 37.5±21.78 | 29.5±20.51 |           |
| 307 mg/kg | 0.1±0.04  | 12±2.83   | 1.24±0.76 | 2.42±0.06 | 50.1±10.47 | 27±8.49    |           |
| 350 mg/kg | 0.18±0.06 | 13±8.49   | 1.85±0.97 | 1.69±1.29 | 46.6±2.4   | 27±18.38   |           |
| 380 mg/kg | 0.14±0.05 | 13.5±2.12 | 0.89±0.06 | 2.46±0.08 | 57.1±0.14  | 30±4.24    |           |
| 414 mg/kg | 0.08±0.01 | 9.5±2.12  | 0.44±0.59 | 2.43±0.02 | 56.4±1.84  | 19±0       |           |

No abnormal changes in biochemical indices in serum of mice. \*  $p < 0.05$ , \*\* $p < 0.01$ , \*\*\* $p < 0.001$ , \*\*\*\* $p < 0.0001$ .

**Table S3:** Routine blood test results of acute toxicity test in rat.

|              | WBC             | RBC         | Hb            | MCV        | PLT            | LYMPH           | MXD          |
|--------------|-----------------|-------------|---------------|------------|----------------|-----------------|--------------|
| Blank        | 8.99±2.44       | 6.65±0.24   | 182.75±58.27  | 64.95±1.82 | 507.5±158.55   | 7.32±1.6        | 0.28±0.09    |
| 0.9%<br>NaCl | 7.22±0.99       | 7.39±1.5    | 159.83±27.24  | 63.3±0.73  | 415.83±129.92  | 6.03±1.05       | 0.24±0.04    |
| 1<br>mg/kg   | 7.03±2.23       | 14.04±22.15 | 162.9±31.29   | 65.67±3.24 | 553.8±64.37    | 5.81±2.05       | 0.23±0.08    |
| 2<br>mg/kg   | 3.76±2.35***    | 5.08±1.55   | 114.33±34.58* | 62.8±2.21  | 330±233.71     | 3.09±1.67***    | 0.11±0.11*   |
| 10<br>mg/kg  | 14.45±36.82**** | 6.95±1.42   | 157.33±33.74  | 63.19±2.18 | 203.56±44.74** | 10.32±24.98**** | 0.59±1.64*** |
|              | DLC             | LY%         | MID%          | DLC%       | P-LCR          | B-PLT           | HCT          |
| Blank        | 1.4±0.84        | 82.45±6.32  | 3.05±0.42     | 14.5±6.06  | 38.83±6.77     | 190.25±40.75    | 43.15±1.08   |
| 0.9%<br>NaCl | 0.95±0.19       | 83.15±4.39  | 3.32±0.42     | 13.53±4.12 | 40.67±3.89     | 165±40.14       | 46.77±9.57   |
| 1<br>mg/kg   | 0.99±0.6        | 82.41±9.3   | 3.32±0.61     | 14.27±8.72 | 36.55±3.29     | 202.7±31.31     | 46.91±9.41   |
| 2<br>mg/kg   | 0.57±0.6        | 87.61±10.91 | 2.07±1.65     | 10.32±9.29 | 39.79±5.97     | 120.89±72.91    | 32.08±10.26  |
| 10<br>mg/kg  | 3.6±10.18**     | 90.46±11.81 | 1.27±1.37**   | 8.28±10.57 | 45.79±22.41    | 96.89±62.89     | 43.92±9.29   |
|              | MCHC            | RDW         | RDW-SD        | MCH        | MPV            | PCT             | PDW          |
| Blank        | 425.5±145.7     | 11.6±0.74   | 64.13±5.79    | 27.5±8.81  | 10.65±0.13     | 0.54±0.17       | 18.03±1      |
| 0.9%<br>NaCl | 344.17±14.85    | 12.03±0.87  | 65.17±4.2     | 21.77±1.03 | 10.45±0.14     | 0.43±0.13       | 17.07±0.85   |

|          |              |            |            |            |            |             |              |
|----------|--------------|------------|------------|------------|------------|-------------|--------------|
| 1 mg/kg  | 347.8±8.38   | 12.15±1.39 | 66.84±8.4  | 22.86±1.14 | 10.67±0.33 | 0.59±0.08   | 18.06±0.88   |
| 2 mg/kg  | 359.11±12.84 | 10.42±1.54 | 60.47±6.33 | 22.51±0.54 | 10.33±0.3  | 0.35±0.25   | 18.21±1.22   |
| 10 mg/kg | 358.56±22.92 | 11.24±1.48 | 61.6±6.02  | 22.68±1.94 | 10.48±0.26 | 0.21±0.05** | 15.82±0.64** |

Rats in the 10 mg/kg group showed significant changes in several blood indices. \*  $p < 0.05$ , \*\*  $p < 0.01$ , \*\*\*  $p < 0.001$ , \*\*\*\*  $p < 0.0001$ .

**Table S4: The results of biochemical indicators of acute toxicity test in rat.**

|           | ALT          | AST          | TBIL      | ALB        | CREA       | BUN        | TG        |
|-----------|--------------|--------------|-----------|------------|------------|------------|-----------|
| Blank     | 37.35±3.72   | 112.45±15.58 | 3.43±1.75 | 19.88±2.82 | 11.18±4.7  | 1.35±0.49  | 0.41±0.16 |
| 0.9% NaCl | 33.37±4.49   | 112.65±20.81 | 3.33±0.65 | 20.35±3.71 | 8.38±3.1   | 1.54±0.37  | 0.21±0.09 |
| 1 mg/kg   | 38.04±10.62  | 135.82±32.39 | 3.68±0.93 | 21.11±2.02 | 11.89±3.74 | 1.82±0.4   | 0.38±0.2  |
| 2 mg/kg   | 27.06±7.24   | 86.44±29.98  | 3.53±0.94 | 19.19±3.94 | 9.12±4.59  | 1.72±0.43  | 0.35±0.28 |
| 10 mg/kg  | 19.54±12.18* | 74.52±30.35  | 3.22±0.91 | 18.74±2.47 | 11.08±4.5  | 2.47±0.84* | 0.24±0.04 |

  

|           | TC         | ALP            | GLU       | K         | CL         | CK             |
|-----------|------------|----------------|-----------|-----------|------------|----------------|
| Blank     | 0.81±0.22  | 116.75±14.66   | 2.57±0.86 | 2.62±0.48 | 51.83±1.71 | 846.5±296.78   |
| 0.9% NaCl | 0.63±0.17  | 97.83±40.29    | 2.52±0.59 | 2±0.26    | 53.63±7.08 | 624±185.35     |
| 1 mg/kg   | 0.6±0.22   | 96.2±26.72     | 2.84±0.49 | 2.27±0.35 | 53.46±3.19 | 857.8±280.32   |
| 2 mg/kg   | 0.69±0.21  | 105.56±35.36   | 3.54±0.72 | 2.52±0.42 | 55.79±4.37 | 507.11±351.9   |
| 10 mg/kg  | 0.45±0.17* | 37.44±14.23*** | 2.87±0.44 | 2.06±0.43 | 56.2±2.92  | 187.89±57.27** |

At 10 mg/kg, significant changes in several serum biochemical indices were observed in rats. \*  $p < 0.05$ , \*\*  $p < 0.01$ , \*\*\*  $p < 0.001$ , \*\*\*\*  $p < 0.0001$ .

**Figure S1: Western blot analysis was conducted without any image cropping.**

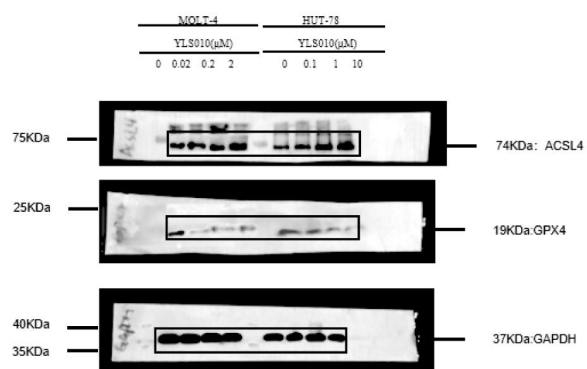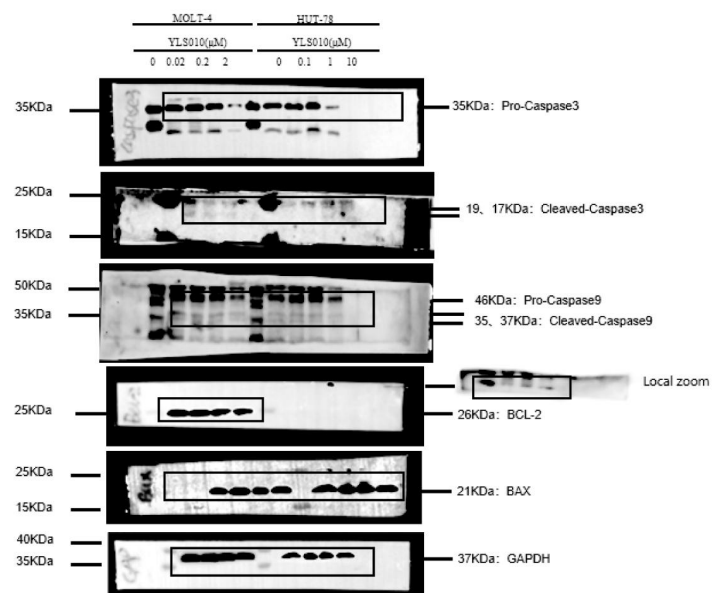

Supplement: s1 [file s1]
